# Supplementary material for: Water depletion: An improved metric for incorporating seasonal and dry-year water scarcity into water risk assessments
Source: Oxford University Press journal article supplement (doi:10.12952/journal.elementa.000083), 2016-01-20
Supplement: elementa_000083_s009.docx [file elementa_000083_s009.docx]

**Table S3: Reclassification of watersheds assuming decrease in water availability and increase in water consumption**

| Depletion Level | Integrated Scale  # watersheds | Annual only  # watersheds | 25% reduction in water availability | 25% increase in consumption | 25% reduced availability AND 25% increased consumption |
| --- | --- | --- | --- | --- | --- |
| < 5% | 10202 (67%) | 13029 (86%) | 9882 (65%) | 9953 (66%) | 9641 (64%) |
| 5-25% | 79 (0.5%) | 1300 (9%) | 107 (0.7%) | 99 (0.7%) | 127 (0.8%) |
| 25-50% | 0 | 308 (2%) | 0 | 0 | 0 |
| 50-75% | 0 | 128 (0.8%) | 0 | 0 | 0 |
| Dry-year | 3104 (21%) | - | 3171 (21%) | 3164 (21%) | 3190 (21%) |
| Seasonal | 1380 (9%) | - | 1520 (10%) | 1477 (10%) | 1638 (11%) |
| 75-100% | 73 (0.5%) | 73 (0.5%) | 85 (0.6%) | 87 (0.6%) | 97 (0.6%) |
| >100% | 253 (1.7%) | 253 (1.7%) | 326 (2%) | 311 (2%) | 398 (2.6%) |
