# Supplementary material for: Water depletion: An improved metric for incorporating seasonal and dry-year water scarcity into water risk assessments
Source: Oxford University Press journal article supplement (doi:10.12952/journal.elementa.000083), 2016-01-20
Supplement: elementa_000083_s010.docx [file elementa_000083_s010.docx]

**Table S4: Impact of spatial disaggregation of water consumption and availability**

|  | **Distribution of watersheds in each depletion category** | |
| --- | --- | --- |
| **Depletion Category** | **Aggregate sub-watersheds** | **Net sub-watersheds** |
| **<5%** | 9913 | 10202 |
| **5-25%** | 144 | 79 |
| **25-50%** | 0 | 0 |
| **50-75%** | 0 | 0 |
| **75-100%** | 3124 | 3104 |
| **+100%** | 1533 | 1380 |
| **Dry-year** | 86 | 73 |
| **Seasonal** | 291 | 253 |
